# Supplementary material
Source: PubMed Central journal article supplement (PMC7675486)
Supplement: JGS-68-2721-s001.pdf [file JGS-68-2721-s001.pdf]

**Supplementary Table S1:** Characteristics of Nursing Homes by Completeness of Data on Personal Protective Equipment (PPE) and Staffing Shortages Over the Period from June 15 through July 19, 2020 (n=15,388)

|                                                                                 | Facilities with complete data on PPE and staffing shortages<br>(n=13,445) | Facilities with incomplete data on PPE and staffing shortages<br>(n=1,943) | <i>p-value</i> | Number of facilities with incomplete data that reported PPE or staffing shortage information in each week |
|---------------------------------------------------------------------------------|---------------------------------------------------------------------------|----------------------------------------------------------------------------|----------------|-----------------------------------------------------------------------------------------------------------|
| <b>Reported PPE shortage during week ending:</b>                                |                                                                           |                                                                            |                |                                                                                                           |
| June 21, 2020 (%)                                                               | 18.7                                                                      | 17.0                                                                       | .104           | 1,515                                                                                                     |
| June 28, 2020 (%)                                                               | 18.1                                                                      | 17.9                                                                       | .877           | 1,448                                                                                                     |
| July 5, 2020 (%)                                                                | 17.3                                                                      | 17.3                                                                       | .993           | 1,521                                                                                                     |
| July 12, 2020 (%)                                                               | 16.8                                                                      | 15.8                                                                       | .305           | 1,445                                                                                                     |
| July 19, 2020 (%)                                                               | 18.8                                                                      | 12.1                                                                       | <.001          | 974                                                                                                       |
| <b>Reported staffing shortage during week ending:</b>                           |                                                                           |                                                                            |                |                                                                                                           |
| June 21, 2020 (%)                                                               | 20.2                                                                      | 20.3                                                                       | .898           | 1,523                                                                                                     |
| June 28, 2020 (%)                                                               | 20.7                                                                      | 21.0                                                                       | .789           | 1,460                                                                                                     |
| July 5, 2020 (%)                                                                | 21.0                                                                      | 21.1                                                                       | .927           | 1,529                                                                                                     |
| July 12, 2020 (%)                                                               | 21.1                                                                      | 23.5                                                                       | .039           | 1,453                                                                                                     |
| July 19, 2020 (%)                                                               | 21.8                                                                      | 19.7                                                                       | .115           | 976                                                                                                       |
| <b>State in which facility is located:</b>                                      |                                                                           |                                                                            |                |                                                                                                           |
| In Northeast PPE Consortium (%)                                                 | 15.5                                                                      | 15.4                                                                       | .900           |                                                                                                           |
| Has LTC teams with a focus beyond testing (%)                                   | 27.5                                                                      | 26.0                                                                       | .174           |                                                                                                           |
| LTC workforce supports                                                          |                                                                           |                                                                            |                |                                                                                                           |
| Adjusted licensing or training requirements (%)                                 | 20.0                                                                      | 22.1                                                                       | .034           |                                                                                                           |
| Increased payments or incentives for staff (%)                                  | 21.1                                                                      | 17.4                                                                       | <.001          |                                                                                                           |
| Offers job match assistance (%)                                                 | 27.1                                                                      | 25.6                                                                       | .179           |                                                                                                           |
| Expanded Medicaid payments to LTC (%)                                           | 49.6                                                                      | 43.8                                                                       | <.001          |                                                                                                           |
| <b>County in which facility is located:</b>                                     |                                                                           |                                                                            |                |                                                                                                           |
| Change in COVID-19 cases per 100k pop b/n May 24, 2020 and June 14, 2020 (mean) | 125.8                                                                     | 138.0                                                                      | .050           |                                                                                                           |
| Population >75% urban (%)                                                       | 56.5                                                                      | 61.0                                                                       | <.001          |                                                                                                           |
| <b>Nursing home characteristics:</b>                                            |                                                                           |                                                                            |                |                                                                                                           |
| Nursing home size (%)                                                           |                                                                           |                                                                            |                |                                                                                                           |
| Small (<50 beds)                                                                | 11.8                                                                      | 14.3                                                                       | .006           |                                                                                                           |
| Medium (≥50 & ≤150 beds)                                                        | 72.7                                                                      | 70.9                                                                       |                |                                                                                                           |
| Large (>150 beds)                                                               | 15.5                                                                      | 14.7                                                                       |                |                                                                                                           |
| Ownership (%)                                                                   |                                                                           |                                                                            |                |                                                                                                           |

|                                                                            |      |      |       |  |
|----------------------------------------------------------------------------|------|------|-------|--|
| Non-profit                                                                 | 23.8 | 20.9 | .006  |  |
| Government                                                                 | 6.3  | 7.5  |       |  |
| For-profit                                                                 | 69.9 | 71.6 |       |  |
| Part of a chain (%)                                                        | 59.0 | 53.8 | <.001 |  |
| Located in a hospital (%)                                                  | 4.0  | 5.5  | .004  |  |
| Share of revenue from Medicaid (quartiles)                                 |      |      |       |  |
| 1 (lowest)                                                                 | 25.1 | 28.7 | <.001 |  |
| 2                                                                          | 25.0 | 21.4 |       |  |
| 3                                                                          | 25.0 | 23.2 |       |  |
| 4 (highest)                                                                | 24.9 | 26.7 |       |  |
| Black residents >25% of all residents (%)                                  | 15.8 | 19.3 | <.001 |  |
| CMS Overall Five-Star Rating (%)                                           |      |      |       |  |
| 1 (lowest)                                                                 | 16.3 | 19.2 | <.001 |  |
| 2                                                                          | 19.5 | 20.0 |       |  |
| 3                                                                          | 17.6 | 16.9 |       |  |
| 4                                                                          | 21.1 | 19.9 |       |  |
| 5 (highest)                                                                | 24.3 | 21.3 |       |  |
| Missing rating                                                             | 1.2  | 2.7  |       |  |
| Change in COVID-19 cases per bed b/n May 24, 2020 and June 14, 2020 (mean) | .013 | .016 | .230  |  |

Abbreviations: LTC, long-term care; pop, population; PPE, personal protective equipment

Notes: Information from LTCfocus.org (chain status, in-hospital status, Medicaid resident share, Black resident share) was missing for 960 facilities. The descriptive statistics exclude facilities missing information on a characteristic from estimates for that characteristic. For facilities with incomplete data on PPE and staffing shortages over the five-week study period, weekly PPE and staffing shortage estimates were based on the facilities that reported shortage information in that week.

**Supplementary Table S2:** State Action, County, Facility, and Resident Characteristics of Nursing Homes by Shortages of Personal Protective Equipment (PPE) and Staff, June 15 through July 19, 2020 (n=13,445)

|                                                                                 | Short PPE at<br>Least One<br>Week<br><br>(n=3,710) | Not Short<br>PPE<br><br>(n=9,735) | <i>p-value</i> | Short Staff at<br>Least One<br>Week<br><br>(n=4,054) | Not Short<br>Staff<br><br>(n=9,391) | <i>p-value</i> |
|---------------------------------------------------------------------------------|----------------------------------------------------|-----------------------------------|----------------|------------------------------------------------------|-------------------------------------|----------------|
| <b>State in which facility is located:</b>                                      |                                                    |                                   |                |                                                      |                                     |                |
| In Northeast PPE Consortium (%)                                                 | 13.5                                               | 16.3                              | <.001          | 12.8                                                 | 16.7                                | <.001          |
| Has LTC teams with a focus beyond testing (%)                                   | 25.2                                               | 28.4                              | <.001          | 21.8                                                 | 30.0                                | <.001          |
| LTC workforce supports                                                          |                                                    |                                   |                |                                                      |                                     |                |
| Adjusted licensing or training requirements (%)                                 | 20.5                                               | 19.9                              | .423           | 20.0                                                 | 20.0                                | .951           |
| Increased payments or incentives for staff (%)                                  | 21.9                                               | 20.7                              | .145           | 16.6                                                 | 23.0                                | <.001          |
| Offers job match assistance (%)                                                 | 25.8                                               | 27.5                              | .048           | 21.3                                                 | 29.5                                | <.001          |
| Expanded Medicaid payments to LTC (%)                                           | 52.4                                               | 48.5                              | <.001          | 48.2                                                 | 50.2                                | .034           |
| <b>County in which facility is located:</b>                                     |                                                    |                                   |                |                                                      |                                     |                |
| Change in COVID-19 cases per 100k pop b/n May 24, 2020 and June 14, 2020 (mean) | 128.2                                              | 124.9                             | .292           | 127.3                                                | 125.2                               | .506           |
| Population >75% urban (%)                                                       | 55.2                                               | 57.0                              | .060           | 49.5                                                 | 59.6                                | <.001          |
| <b>Nursing home characteristics:</b>                                            |                                                    |                                   |                |                                                      |                                     |                |
| Nursing home size (%)                                                           |                                                    |                                   |                |                                                      |                                     |                |
| Small (<50 beds)                                                                | 11.5                                               | 12.0                              | .190           | 10.8                                                 | 12.2                                | .067           |
| Medium (≥50 & ≤150 beds)                                                        | 73.8                                               | 72.2                              |                | 73.4                                                 | 72.4                                |                |
| Large (>150 beds)                                                               | 14.7                                               | 15.8                              |                | 15.8                                                 | 15.4                                |                |
| Ownership (%)                                                                   |                                                    |                                   |                |                                                      |                                     |                |
| Non-profit                                                                      | 19.6                                               | 25.3                              | <.001          | 21.3                                                 | 24.8                                | <.001          |
| Government                                                                      | 4.5                                                | 7.0                               |                | 7.3                                                  | 5.9                                 |                |
| For-profit                                                                      | 75.9                                               | 67.7                              |                | 71.4                                                 | 69.3                                |                |
| Part of a chain (%)                                                             | 57.8                                               | 54.9                              | .002           | 55.4                                                 | 55.8                                | .617           |
| Located in a hospital (%)                                                       | 2.4                                                | 4.4                               | <.001          | 3.1                                                  | 4.1                                 | .007           |
| Share of revenue from Medicaid (quartiles)                                      |                                                    |                                   |                | 10.1                                                 | 8.2                                 | <.001          |
| 1 (lowest)                                                                      | 24.0                                               | 25.5                              | .171           | 21.2                                                 | 26.8                                | <.001          |
| 2                                                                               | 26.0                                               | 24.6                              |                | 24.7                                                 | 25.1                                |                |
| 3                                                                               | 25.6                                               | 24.8                              |                | 24.8                                                 | 25.7                                |                |
| 4 (highest)                                                                     | 24.4                                               | 25.1                              |                | 23.3                                                 | 28.4                                |                |

|                                                                            |      |      |      |      |      |       |
|----------------------------------------------------------------------------|------|------|------|------|------|-------|
| Black residents >25% of all residents (%)                                  | 14.3 | 15.2 | .182 | 18.3 | 13.5 | <.001 |
| CMS Overall Five-Star Rating (%)                                           |      |      |      |      |      |       |
| 1 (lowest)                                                                 | 16.3 | 16.3 | .389 | 20.4 | 14.5 | <.001 |
| 2                                                                          | 20.1 | 19.3 |      | 21.2 | 18.8 |       |
| 3                                                                          | 17.6 | 17.5 |      | 17.8 | 17.5 |       |
| 4                                                                          | 21.7 | 20.8 |      | 19.6 | 21.7 |       |
| 5 (highest)                                                                | 23.2 | 24.9 |      | 19.9 | 26.4 |       |
| Missing rating                                                             | 1.1  | 1.2  |      | 1.1  | 1.1  |       |
| Change in COVID-19 cases per bed b/n May 24, 2020 and June 14, 2020 (mean) | .013 | .014 | .248 | .015 | .012 | .004  |

Abbreviations: LTC, long-term care; pop, population; PPE, personal protective equipment

Notes: Information from LTCfocus.org (chain status, in-hospital status, Medicaid resident share, Black resident share) was missing for 754 facilities. The descriptive statistics exclude facilities missing information on a characteristic from estimates for that characteristic.
